# Supplementary material for: Molecular reaction and dynamic mechanism of iodate reduction to molecular iodine by nitrogen(iii) in aqueous solution
Source: Royal Society of Chemistry journal article supplement (doi:10.1039/d2cp02995b), 2022-01-01
Supplement: d2cp02995b1.pdf [file d2cp02995b1.pdf]

# Support Information

## Molecular reaction and dynamic mechanism of iodate reduction to molecular iodine by nitrous acid in acidic solution

*Chang Cui,<sup>a</sup> Dongxiang Zhang,<sup>\*a</sup> Constantin Muhire,<sup>a</sup> Alemtsehay Tesfay Reda,<sup>a</sup> Jinying Li<sup>b, c</sup> and  
Xiyun Xu<sup>\*a</sup>*

*a. School of Chemistry and Chemical Engineering, Beijing Institute of Technology, Beijing  
102488, PR China. E-mail: boris@bit.edu.cn, xiyunxu@bit.edu.cn*

*b. Department of Radiochemistry, China Institute of Atomic Energy, Beijing, PR China.*

*c. Institute of Nuclear Technology, Chinese Nuclear Society, Beijing 100070, PR China.*

|                                                                   |   |
|-------------------------------------------------------------------|---|
| Support Information.....                                          | 1 |
| 1. Nomenclature.....                                              | 2 |
| 2. Chemical equations based on atomic number conservation .....   | 3 |
| 3. Optimized structure parameters of reactants and products ..... | 3 |
| 4. The change of standard thermodynamic parameters .....          | 5 |

# 1. Nomenclature

| Acronyms                          |                                                                                 |
|-----------------------------------|---------------------------------------------------------------------------------|
| AIMD                              | ab initio molecular dynamics                                                    |
| ADCH                              | Atomic Dipole moment corrected Hirshfeld Population method                      |
| aug-cc-pVTZ-PP                    | Dunning's correlation consistent basis sets with diffuse functions              |
| CCSD (T)                          | Coupled cluster theory with single, double, and perturbative triple excitations |
| CSVR                              | thermal bath of Canonical Sampling Through Velocity Rescaling                   |
| def2-TZVPP                        | Triple zeta valence of two polarization functions basis sets                    |
| DFT                               | density functional theory                                                       |
| ESP                               | electrostatic potential                                                         |
| IRC                               | intrinsic reaction coordinate                                                   |
| IRI                               | interaction regional indicator                                                  |
| M06-2x                            | global hybrid functional in Minnesota series functional                         |
| NVT                               | ensemble at constant volume and temperature                                     |
| TS                                | transition state                                                                |
| vdW                               | van der Waals                                                                   |
| $k_{\text{TST}}$                  | The reaction rate parameter of molecular reaction calculated by TS theory       |
| ZPE                               | zero point energy of vibration                                                  |
| $\Delta E_0^\ominus$              | Internal energy change in ground state                                          |
| $\Delta E_{\text{elec}}^\ominus$  | electronic binding energy change of standard state                              |
| $\Delta E_{\text{rot}}^\ominus$   | electronic rotation energy change of standard state                             |
| $\Delta E_{\text{trans}}^\ominus$ | electronic translation energy change of standard state                          |
| $\Delta E_{\text{vib}}^\ominus$   | electronic vibration energy change of standard state                            |
| $\Delta E^\ominus$                | Sum of electronic energy change and thermal correction to Internal energy       |
| $\Delta G^\ominus$                | Gibbs free energy gap of standard state                                         |
| $\Delta H^\ominus$                | Enthalpy change of standard state                                               |
| $\Delta S^\ominus$                | Entropy change of standard state                                                |
| Greek Symbols                     |                                                                                 |
| $\lambda_2$                       | The second largest eigenvalue of electron density Hessian matrix                |
| $\rho$                            | electron density                                                                |
| $ \nabla\rho(\mathbf{r}) $        | Module of electron density gradient                                             |

## 2. Chemical equations based on atomic number conservation

Based on atomic number conservation (Path1):

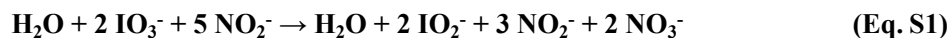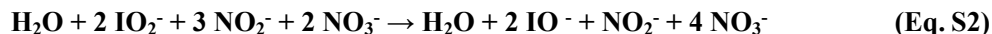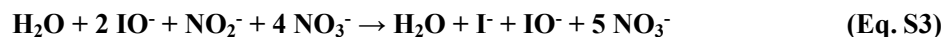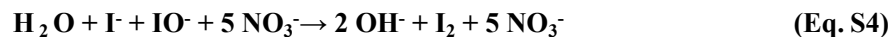

Based on atomic number conservation (Path2):

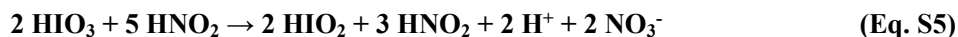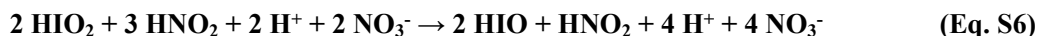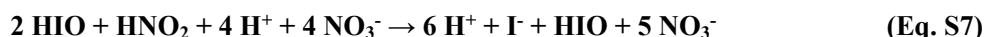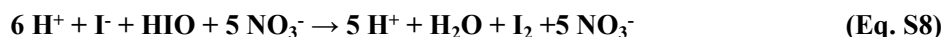

## 3. Optimized structure parameters of reactants and products

**Table 1** Optimized structure parameters of reactants and products

| Symbol                             | Bond(Å)       | Angle (°)         | Dihedral (°)         |
|------------------------------------|---------------|-------------------|----------------------|
| HIO <sub>3</sub> -NO <sub>2</sub>  |               |                   |                      |
| I1                                 |               |                   |                      |
| O2                                 | (R2-1)2.03825 |                   |                      |
| O3                                 | (R3-1)1.74002 | (A3-1-2)92.07045  |                      |
| O4                                 | (R4-2)2.78260 | (A4-2-1)41.94017  | (D4-2-1-3)103.35657  |
| H5                                 | (R5-2)0.97913 | (A5-2-1)108.13694 | (D5-2-1-3)-157.20270 |
| H6                                 | (R6-4)0.97766 | (A6-4-2)75.66109  | (D6-4-2-1)-138.39639 |
| N7                                 | (R7-2)1.96297 | (A7-2-1)156.19467 | (D7-2-1-3)35.18472   |
| O8                                 | (R8-7)1.17434 | (A8-7-2)110.41544 | (D8-7-2-1)-7.17642   |
| O9                                 | (R9-7)1.17815 | (A9-7-2)113.72823 | (D9-7-2-1)174.06450  |
| HIO <sub>2</sub> -HNO <sub>2</sub> |               |                   |                      |
| I1                                 |               |                   |                      |
| O2                                 | (R2-1)1.93017 |                   |                      |
| O3                                 | (R3-2)4.62745 | (A3-2-1) 82.40432 |                      |
| H4                                 | (R4-2)0.96757 | (A4-2-1)107.70274 | (D4-2-1-3) 97.11972  |
| H5                                 | (R5-3)3.10477 | (A5-3-2) 47.42174 | (D5-3-2-1) 28.83261  |
| N6                                 | (R6-3)1.20970 | (A6-3-2) 76.39539 | (D6-3-2-1) 17.29833  |
| O7                                 | (R7-6)1.21259 | (A7-6-3)123.46799 | (D7-6-3-2)-178.04113 |
| O8                                 | (R8-6)1.96470 | (A8-6-3)115.89510 | (D8-6-3-2) -8.75427  |
| HIO-HNO <sub>2</sub>               |               |                   |                      |
| I1                                 |               |                   |                      |
| O2                                 | (R2-1)2.20189 |                   |                      |
| O3                                 | (R3-2)2.81794 | (A3-2-1)157.14602 |                      |
| H4                                 | (R4-2)0.97211 | (A4-2-1)97.43186  | (D4-2-1-3)-80.08153  |
| N5                                 | (R5-3)1.21560 | (A5-3-2)38.63330  | (D5-3-2-1)174.40868  |
| O6                                 | (R6-5)1.21407 | (A6-5-3)122.45189 | (D6-5-3-2)-166.12128 |

|    |               |                  |                     |
|----|---------------|------------------|---------------------|
| H7 | (R7-2)2.80045 | (A7-2-1)35.09262 | (D7-2-1-5)-57.04799 |
|----|---------------|------------------|---------------------|

HIO-HI

H1

|                |               |
|----------------|---------------|
| I <sub>2</sub> | (R2-1)2.76226 |
|----------------|---------------|

|    |               |                  |
|----|---------------|------------------|
| O3 | (R3-1)0.97060 | (A3-1-2)54.26776 |
|----|---------------|------------------|

|    |               |                   |                     |
|----|---------------|-------------------|---------------------|
| I4 | (R4-3)3.15564 | (A4-3-1)148.91539 | (D4-3-1-2)-77.11391 |
|----|---------------|-------------------|---------------------|

|    |               |                   |                      |
|----|---------------|-------------------|----------------------|
| H5 | (R5-3)0.97375 | (A5-3-1)107.15543 | (D5-3-1-2)-114.95589 |
|----|---------------|-------------------|----------------------|

---

## 4. The change of standard thermodynamic parameters

**Table S2** The change of standard thermodynamic parameters of the proposed two reaction pathways of iodate reduction by nitrous acid under temperatures of 298–373 K.

| Reaction path                                                        | Path1    | Path2    |
|----------------------------------------------------------------------|----------|----------|
| 298 K                                                                |          |          |
| $\Delta E_0^\ominus/(\text{kJ}\cdot\text{mol}^{-1})$                 | -113.595 | -159.650 |
| $\Delta E^\ominus/(\text{kJ}\cdot\text{mol}^{-1})$                   | -143.770 | -194.950 |
| $\Delta H^\ominus/(\text{kJ}\cdot\text{mol}^{-1})$                   | -120.624 | -166.811 |
| $\Delta G^\ominus/(\text{kJ}\cdot\text{mol}^{-1})$                   | -85.930  | -143.160 |
| $\Delta S^\ominus/(\text{kJ}\cdot\text{mol}^{-1}\cdot\text{K}^{-1})$ | 1.829    | 1.771    |
| 303 k                                                                |          |          |
| $\Delta E_0^\ominus/(\text{kJ}\cdot\text{mol}^{-1})$                 | -113.595 | -159.650 |
| $\Delta E^\ominus/(\text{kJ}\cdot\text{mol}^{-1})$                   | -143.770 | -194.950 |
| $\Delta H^\ominus/(\text{kJ}\cdot\text{mol}^{-1})$                   | -120.752 | -166.977 |
| $\Delta G^\ominus/(\text{kJ}\cdot\text{mol}^{-1})$                   | -85.347  | -142.765 |
| $\Delta S^\ominus/(\text{kJ}\cdot\text{mol}^{-1}\cdot\text{K}^{-1})$ | 1.834    | 1.777    |
| 308 K                                                                |          |          |
| $\Delta E_0^\ominus/(\text{kJ}\cdot\text{mol}^{-1})$                 | -113.595 | -159.650 |
| $\Delta E^\ominus/(\text{kJ}\cdot\text{mol}^{-1})$                   | -143.770 | -194.950 |
| $\Delta H^\ominus/(\text{kJ}\cdot\text{mol}^{-1})$                   | -120.879 | -167.144 |
| $\Delta G^\ominus/(\text{kJ}\cdot\text{mol}^{-1})$                   | -84.761  | -142.369 |
| $\Delta S^\ominus/(\text{kJ}\cdot\text{mol}^{-1}\cdot\text{K}^{-1})$ | 1.840    | 1.782    |
| 313 K                                                                |          |          |
| $\Delta E_0^\ominus/(\text{kJ}\cdot\text{mol}^{-1})$                 | -113.595 | -159.650 |
| $\Delta E^\ominus/(\text{kJ}\cdot\text{mol}^{-1})$                   | -143.770 | -194.950 |
| $\Delta H^\ominus/(\text{kJ}\cdot\text{mol}^{-1})$                   | -121.004 | -167.311 |
| $\Delta G^\ominus/(\text{kJ}\cdot\text{mol}^{-1})$                   | -84.175  | -141.970 |
| $\Delta S^\ominus/(\text{kJ}\cdot\text{mol}^{-1}\cdot\text{K}^{-1})$ | 1.845    | 1.788    |
| 318 K                                                                |          |          |
| $\Delta E_0^\ominus/(\text{kJ}\cdot\text{mol}^{-1})$                 | -113.595 | -159.650 |
| $\Delta E^\ominus/(\text{kJ}\cdot\text{mol}^{-1})$                   | -143.770 | -194.950 |
| $\Delta H^\ominus/(\text{kJ}\cdot\text{mol}^{-1})$                   | -121.126 | -167.477 |
| $\Delta G^\ominus/(\text{kJ}\cdot\text{mol}^{-1})$                   | -83.586  | -141.568 |
| $\Delta S^\ominus/(\text{kJ}\cdot\text{mol}^{-1}\cdot\text{K}^{-1})$ | 1.850    | 1.793    |
| 323 K                                                                |          |          |
| $\Delta E_0^\ominus/(\text{kJ}\cdot\text{mol}^{-1})$                 | -113.595 | -159.650 |
| $\Delta E^\ominus/(\text{kJ}\cdot\text{mol}^{-1})$                   | -143.770 | -194.950 |
| $\Delta H^\ominus/(\text{kJ}\cdot\text{mol}^{-1})$                   | -121.246 | -167.641 |
| $\Delta G^\ominus/(\text{kJ}\cdot\text{mol}^{-1})$                   | -82.996  | -141.164 |
| $\Delta S^\ominus/(\text{kJ}\cdot\text{mol}^{-1}\cdot\text{K}^{-1})$ | 1.855    | 1.798    |
| 328 K                                                                |          |          |
| $\Delta E_0^\ominus/(\text{kJ}\cdot\text{mol}^{-1})$                 | -113.595 | -159.650 |
| $\Delta E^\ominus/(\text{kJ}\cdot\text{mol}^{-1})$                   | -143.770 | -194.950 |
| $\Delta H^\ominus/(\text{kJ}\cdot\text{mol}^{-1})$                   | -121.364 | -167.805 |

|                                                                      |          |          |
|----------------------------------------------------------------------|----------|----------|
| $\Delta G^\ominus/(\text{kJ}\cdot\text{mol}^{-1})$                   | -82.403  | -140.758 |
| $\Delta S^\ominus/(\text{kJ}\cdot\text{mol}^{-1}\cdot\text{K}^{-1})$ | 1.860    | 1.803    |
| 333 K                                                                |          | 333      |
| $\Delta E_0^\ominus/(\text{kJ}\cdot\text{mol}^{-1})$                 | -113.595 | -159.650 |
| $\Delta E^\ominus/(\text{kJ}\cdot\text{mol}^{-1})$                   | -143.770 | -194.950 |
| $\Delta H^\ominus/(\text{kJ}\cdot\text{mol}^{-1})$                   | -121.481 | -167.969 |
| $\Delta G^\ominus/(\text{kJ}\cdot\text{mol}^{-1})$                   | -81.809  | -140.348 |
| $\Delta S^\ominus/(\text{kJ}\cdot\text{mol}^{-1}\cdot\text{K}^{-1})$ | 1.865    | 1.809    |
| 338 K                                                                |          |          |
| $\Delta E_0^\ominus/(\text{kJ}\cdot\text{mol}^{-1})$                 | -113.595 | -159.650 |
| $\Delta E^\ominus/(\text{kJ}\cdot\text{mol}^{-1})$                   | -143.770 | -194.950 |
| $\Delta H^\ominus/(\text{kJ}\cdot\text{mol}^{-1})$                   | -121.594 | -168.131 |
| $\Delta G^\ominus/(\text{kJ}\cdot\text{mol}^{-1})$                   | -81.211  | -139.938 |
| $\Delta S^\ominus/(\text{kJ}\cdot\text{mol}^{-1}\cdot\text{K}^{-1})$ | 1.870    | 1.814    |
| 343 K                                                                |          |          |
| $\Delta E_0^\ominus/(\text{kJ}\cdot\text{mol}^{-1})$                 | -113.595 | -159.650 |
| $\Delta E^\ominus/(\text{kJ}\cdot\text{mol}^{-1})$                   | -143.770 | -194.950 |
| $\Delta H^\ominus/(\text{kJ}\cdot\text{mol}^{-1})$                   | -121.707 | -168.292 |
| $\Delta G^\ominus/(\text{kJ}\cdot\text{mol}^{-1})$                   | -80.614  | -139.523 |
| $\Delta S^\ominus/(\text{kJ}\cdot\text{mol}^{-1}\cdot\text{K}^{-1})$ | 1.875    | 1.819    |
| 348 K                                                                |          |          |
| $\Delta E_0^\ominus/(\text{kJ}\cdot\text{mol}^{-1})$                 | -113.595 | -159.650 |
| $\Delta E^\ominus/(\text{kJ}\cdot\text{mol}^{-1})$                   | -143.770 | -194.950 |
| $\Delta H^\ominus/(\text{kJ}\cdot\text{mol}^{-1})$                   | -121.815 | -168.453 |
| $\Delta G^\ominus/(\text{kJ}\cdot\text{mol}^{-1})$                   | -80.016  | -139.107 |
| $\Delta S^\ominus/(\text{kJ}\cdot\text{mol}^{-1}\cdot\text{K}^{-1})$ | 1.879    | 1.824    |
| 353 K                                                                |          |          |
| $\Delta E_0^\ominus/(\text{kJ}\cdot\text{mol}^{-1})$                 | -113.595 | -159.650 |
| $\Delta E^\ominus/(\text{kJ}\cdot\text{mol}^{-1})$                   | -143.770 | -194.950 |
| $\Delta H^\ominus/(\text{kJ}\cdot\text{mol}^{-1})$                   | -121.924 | -168.613 |
| $\Delta G^\ominus/(\text{kJ}\cdot\text{mol}^{-1})$                   | -79.413  | -138.690 |
| $\Delta S^\ominus/(\text{kJ}\cdot\text{mol}^{-1}\cdot\text{K}^{-1})$ | 1.884    | 1.829    |
| 358 K                                                                |          |          |
| $\Delta E_0^\ominus/(\text{kJ}\cdot\text{mol}^{-1})$                 | -113.595 | -159.650 |
| $\Delta E^\ominus/(\text{kJ}\cdot\text{mol}^{-1})$                   | -143.770 | -194.950 |
| $\Delta H^\ominus/(\text{kJ}\cdot\text{mol}^{-1})$                   | -122.029 | -168.771 |
| $\Delta G^\ominus/(\text{kJ}\cdot\text{mol}^{-1})$                   | -78.812  | -138.269 |
| $\Delta S^\ominus/(\text{kJ}\cdot\text{mol}^{-1}\cdot\text{K}^{-1})$ | 1.889    | 1.834    |
| 363 K                                                                |          |          |
| $\Delta E_0^\ominus/(\text{kJ}\cdot\text{mol}^{-1})$                 | -113.595 | -159.650 |
| $\Delta E^\ominus/(\text{kJ}\cdot\text{mol}^{-1})$                   | -143.770 | -194.950 |
| $\Delta H^\ominus/(\text{kJ}\cdot\text{mol}^{-1})$                   | -122.132 | -168.928 |
| $\Delta G^\ominus/(\text{kJ}\cdot\text{mol}^{-1})$                   | -78.208  | -137.846 |
| $\Delta S^\ominus/(\text{kJ}\cdot\text{mol}^{-1}\cdot\text{K}^{-1})$ | 1.894    | 1.839    |
| 368 K                                                                |          |          |
| $\Delta E_0^\ominus/(\text{kJ}\cdot\text{mol}^{-1})$                 | -113.595 | -159.650 |
| $\Delta E^\ominus/(\text{kJ}\cdot\text{mol}^{-1})$                   | -143.770 | -194.950 |
| $\Delta H^\ominus/(\text{kJ}\cdot\text{mol}^{-1})$                   | -122.233 | -169.084 |
| $\Delta G^\ominus/(\text{kJ}\cdot\text{mol}^{-1})$                   | -77.602  | -137.422 |
| $\Delta S^\ominus/(\text{kJ}\cdot\text{mol}^{-1}\cdot\text{K}^{-1})$ | 1.898    | 1.844    |

| 373 K                                                                |          |          |
|----------------------------------------------------------------------|----------|----------|
| $\Delta E_0^\ominus/(\text{kJ}\cdot\text{mol}^{-1})$                 | -113.595 | -159.650 |
| $\Delta E^\ominus/(\text{kJ}\cdot\text{mol}^{-1})$                   | -143.770 | -194.950 |
| $\Delta H^\ominus/(\text{kJ}\cdot\text{mol}^{-1})$                   | -122.330 | -169.239 |
| $\Delta G^\ominus/(\text{kJ}\cdot\text{mol}^{-1})$                   | -76.995  | -136.995 |
| $\Delta S^\ominus/(\text{kJ}\cdot\text{mol}^{-1}\cdot\text{K}^{-1})$ | 1.903    | 1.849    |
